# Supplementary material for: Macroglia-derived thrombospondin 2 regulates alterations of presynaptic proteins of retinal neurons following elevated hydrostatic pressure
Source: PLoS One. 2017 Sep 27;12(9):e0185388. doi: 10.1371/journal.pone.0185388 (PMC5617560; doi:10.1371/journal.pone.0185388)

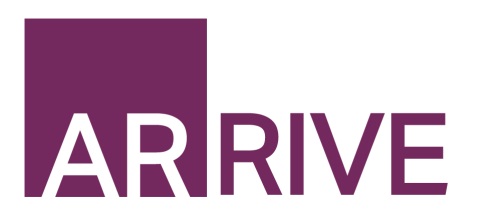


The ARRIVE Guidelines Checklist

Animal Research: Reporting In Vivo Experiments

Carol Kilkenny1, William J Browne2, Innes C Cuthill3, Michael Emerson4 and Douglas G Altman5

*1The National Centre for the Replacement, Refinement and Reduction of Animals in Research, London, UK, 2School of Veterinary Science, University of Bristol, Bristol, UK, 3School of Biological Sciences, University of Bristol, Bristol, UK, 4National Heart and Lung Institute, Imperial College London, UK, 5Centre for Statistics in Medicine, University of Oxford, Oxford, UK.*

|  | | ITEM | RECOMMENDATION | Section/ Paragraph |
| --- | --- | --- | --- | --- |
| 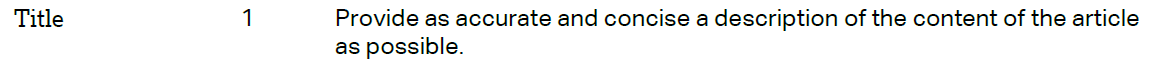 | | | Title |
| 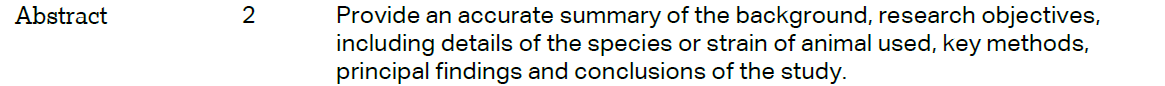 | | | Abstract |
| INTRODUCTION | | |  |
| 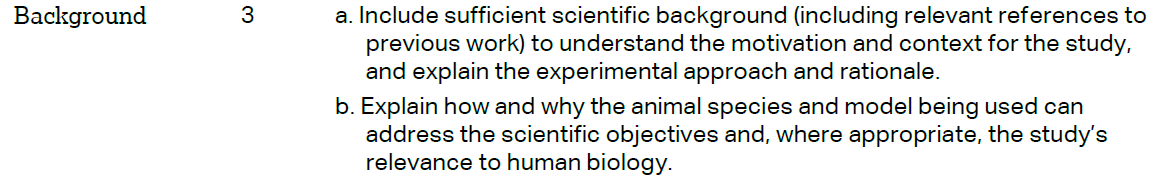 | | | Paragraph1-4  Discussion  Paragraph1 |
| 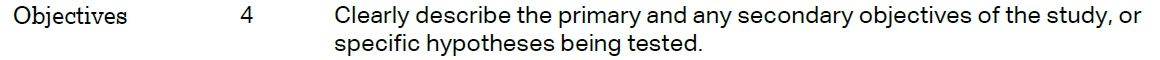 | | | Paragraph4 |
| METHODS | | |  |
| 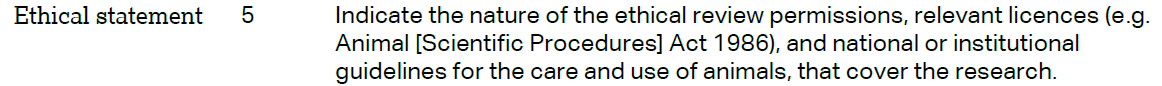 | | | Paragraph1 |
| 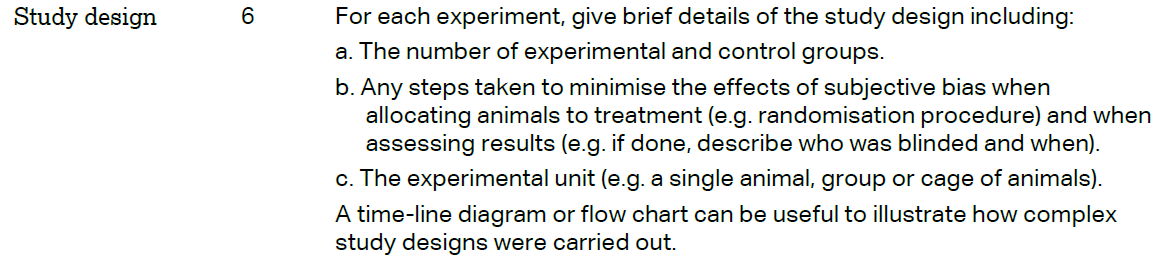 | | | Paragraph1, 3 |
| 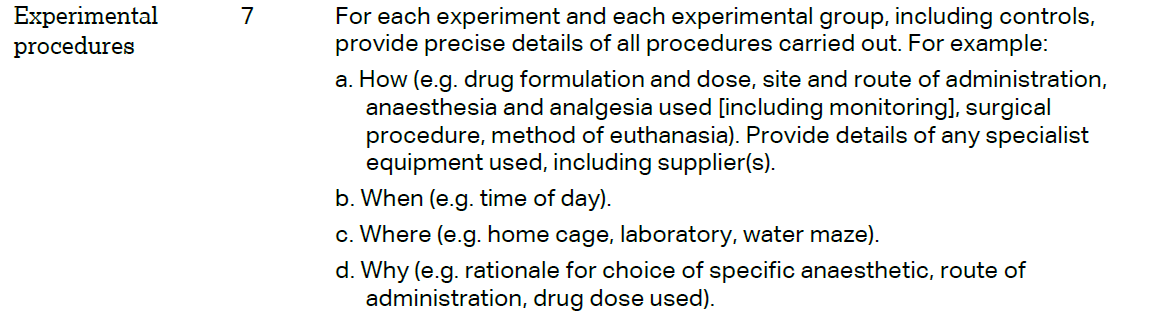 | | | Paragraph1 |
| 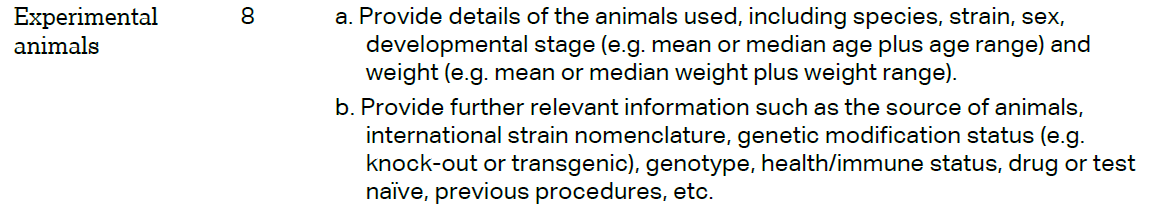 | | | Paragraph1 |

The ARRIVE guidelines. Originally published in *PLoS Biology*, June 20101

| 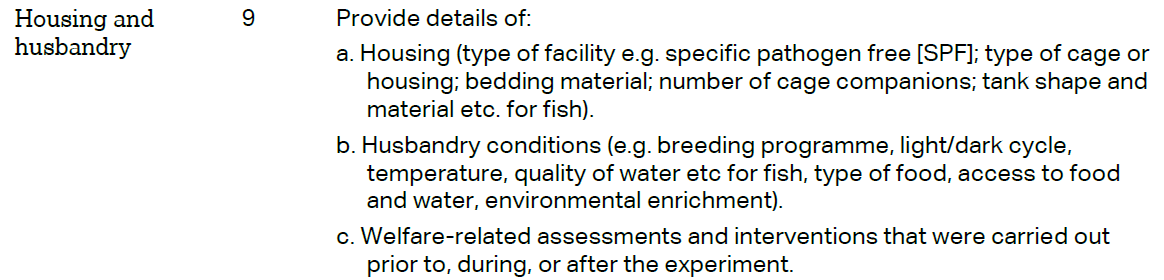 | / | |
| --- | --- | --- |
| 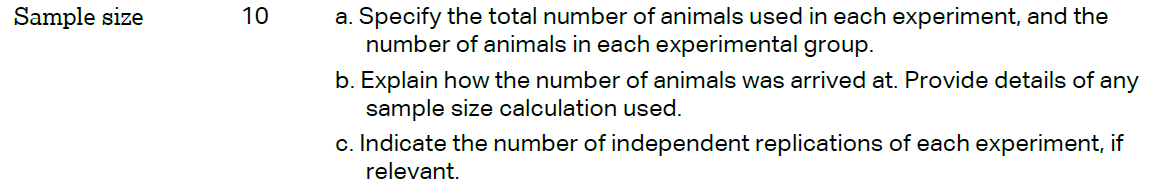 | Paragraph1, 3 | |
| 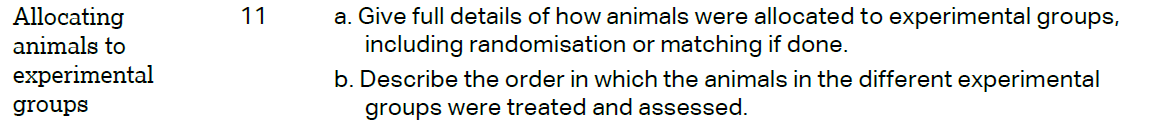 | / | |
| 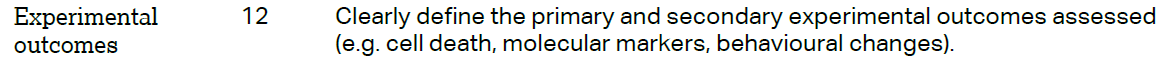 | / | |
| 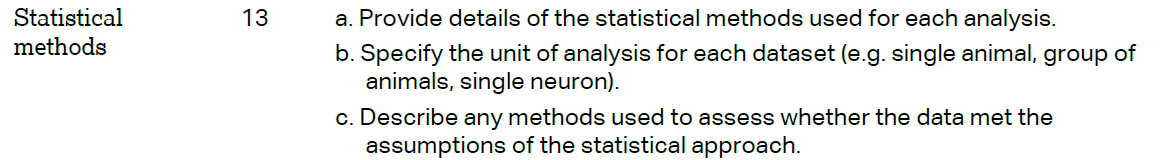 | Paragraph8 | |
| RESULTS |  | |
| 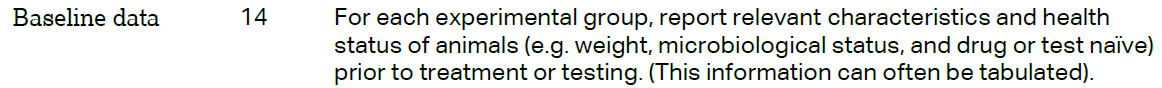 | / | |
| 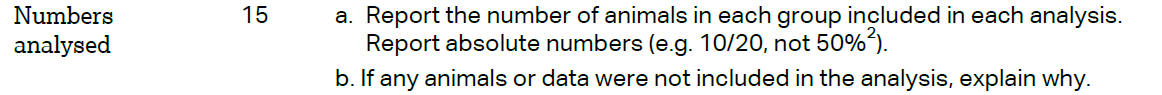 | / | |
| 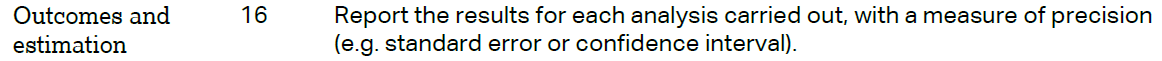 | / | |
| 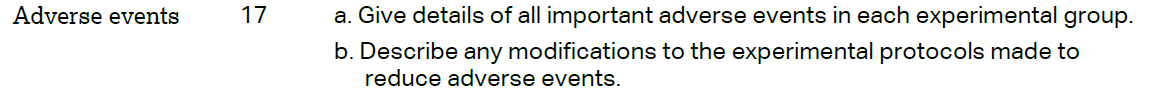 | / | |
| DISCUSSION |  | |
| 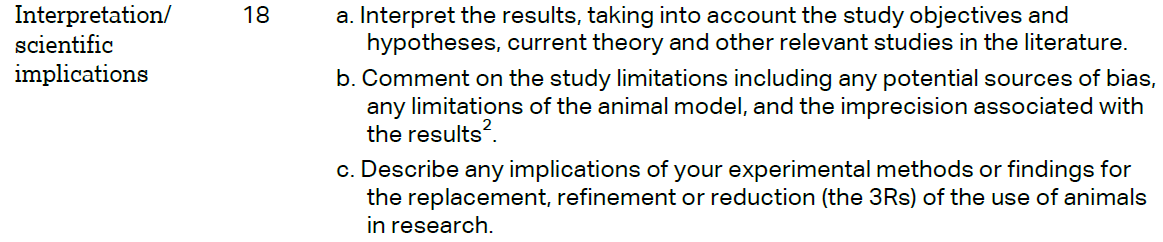 | Throughout  Paragraph 5  / | |
| 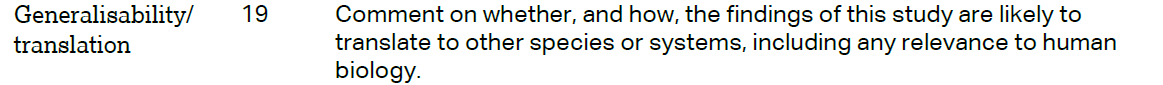 | Paragraph1, 3, 5 | |
| 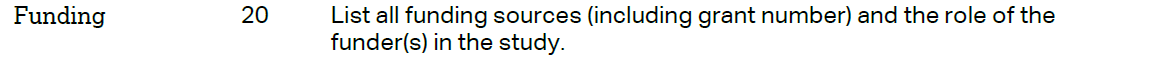 | | Financial Disclosure |


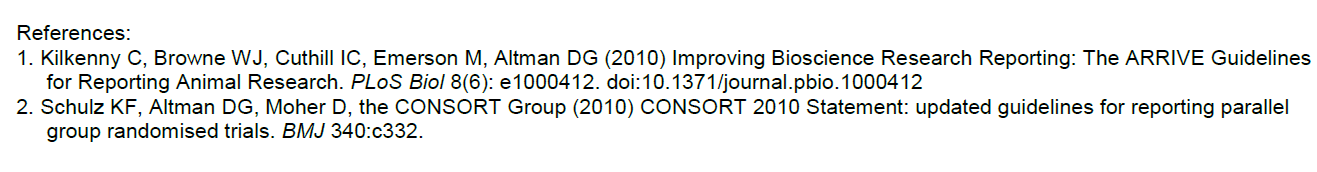

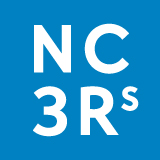

Supplement: S1 File — (DOCX) [file pone.0185388.s001.docx]
